# Supplementary material for: Modulation of value-based decision making behavior by subregions of the rat prefrontal cortex
Source: PubMed Central journal article supplement (PMC7196947; doi:10.1007/s00213-020-05454-7), 2020-02-06

## Electronic Supplementary Material

### Modulation of value-based decision making behavior by subregions of the rat prefrontal cortex

Jeroen P.H. Verharen<sup>1,2,3</sup>, Hanneke E.M. den Ouden<sup>4</sup>, Roger A.H. Adan<sup>1,5</sup>, Louk J.M.J. Vanderschuren<sup>2,5,\*</sup>

<sup>1</sup> Brain Center Rudolf Magnus, Department of Translational Neuroscience, University Medical Center Utrecht, 3584CG Utrecht, The Netherlands.

<sup>2</sup> Department of Animals in Science and Society, Division of Behavioural Neuroscience, Faculty of Veterinary Medicine, Utrecht University, 3584CM Utrecht, The Netherlands.

<sup>3</sup> Helen Wills Neuroscience Institute, Department of Molecular and Cell Biology, University of California Berkeley, Berkeley, CA 94720, United States

<sup>4</sup> Donders Institute for Brain, Cognition and Behaviour, Radboud University, 6525HR Nijmegen, The Netherlands.

<sup>5</sup> These authors contributed equally.

\* Corresponding author: l.j.m.j.vanderschuren@uu.nl, +31-30-2535239

## Online Resource 1

### Supplementary Statistics Table

| Figure          | Test used                                            | <i>n</i>                                             | p value                                   | Test statistic                                   | Effect size<br>(Partial eta squared)                                 |                                                                      |
|-----------------|------------------------------------------------------|------------------------------------------------------|-------------------------------------------|--------------------------------------------------|----------------------------------------------------------------------|----------------------------------------------------------------------|
| 1c<br>Reversals | 2-way repeated<br>measures ANOVA                     | 49 rats                                              | Main drug effect<br>p = 0.0006***         | Main drug effect<br>F(1, 44) = 13.63             |                                                                      |                                                                      |
|                 |                                                      |                                                      | Main group effect<br>p = 0.0003***        | Main group effect<br>F(4, 44) = 6.469            |                                                                      |                                                                      |
|                 |                                                      |                                                      | Group * drug<br>interaction<br>p = 0.1252 | Group * drug<br>interaction<br>F(4, 44) = 1.913  |                                                                      |                                                                      |
|                 |                                                      | post-hoc Holm-<br>Sidak ACC group<br>(sal vs BM)     | 10 rats                                   | p = 0.9931                                       | t(44) = 0.009                                                        | Measurement 1 = 0.1615<br>Measurement 2 = 0.1380<br>Average = 0.0000 |
|                 |                                                      | post-hoc Holm-<br>Sidak<br>PrL group (sal vs<br>BM)  | 12 rats                                   | p = 0.1636                                       | t(44) = 1.948                                                        | Measurement 1 = 0.0846<br>Measurement 2 = 0.4889<br>Average = 0.3676 |
|                 |                                                      | post-hoc Holm-<br>Sidak<br>IL group (sal vs BM)      | 9 rats                                    | p = 0.0285 *                                     | t(44) = 2.818                                                        | Measurement 1 = 0.3291<br>Measurement 2 = 0.1913<br>Average = 0.5022 |
|                 |                                                      | post-hoc Holm-<br>Sidak<br>mOFC group (sal vs<br>BM) | 9 rats                                    | p = 0.8780                                       | t(44) = 0.4559                                                       | Measurement 1 = 0.4254<br>Measurement 2 = 0.0705<br>Average = 0.0361 |
|                 | post-hoc Holm-<br>Sidak<br>IOFC group (sal vs<br>BM) | 9 rats                                               | p = 0.0215 *                              | t(44) = 3.007                                    | Measurement 1 = 0.0954<br>Measurement 2 = 0.5068<br>Average = 0.3506 |                                                                      |
| 1c<br>Rewarded  | 2-way repeated<br>measures ANOVA                     | 49 rats                                              | Main drug effect<br>p < 0.0001 ****       | Main drug effect<br>F(1, 44) = 21.80             |                                                                      |                                                                      |
|                 |                                                      |                                                      | Main group effect<br>p = 0.0174 *         | Main group effect<br>F(4, 44) = 3.362            |                                                                      |                                                                      |
|                 |                                                      |                                                      | Group * drug<br>interaction<br>p = 0.4666 | Group * drug<br>interaction<br>F(4, 44) = 0.9099 |                                                                      |                                                                      |
|                 |                                                      | post-hoc Holm-<br>Sidak ACC group<br>(sal vs BM)     | 10 rats                                   | p = 0.3814                                       | t(44) = 1.110                                                        | Measurement 1 = 0.6551<br>Measurement 2 = 0.0699<br>Average = 0.1992 |
|                 | post-hoc Holm-<br>Sidak<br>PrL group (sal vs<br>BM)  | 12 rats                                              | p = 0.0414 *                              | t(44) = 2.672                                    | Measurement 1 = 0.1703<br>Measurement 2 = 0.3810<br>Average = 0.4303 |                                                                      |
|                 | post-hoc Holm-<br>Sidak<br>IL group (sal vs BM)      | 9 rats                                               | p = 0.3814                                | t(44) = 1.262                                    | Measurement 1 = 0.0023<br>Measurement 2 = 0.0898<br>Average = 0.1157 |                                                                      |

| Figure                        | Test used                                     | n       | p value                                                                                                                       | Test statistic                                                                                                                             | Effect size<br>(Partial eta squared)                                 |
|-------------------------------|-----------------------------------------------|---------|-------------------------------------------------------------------------------------------------------------------------------|--------------------------------------------------------------------------------------------------------------------------------------------|----------------------------------------------------------------------|
|                               | post-hoc Holm-Sidak<br>mOFC group (sal vs BM) | 9 rats  | p = 0.0071**                                                                                                                  | t(44) = 3.402                                                                                                                              | Measurement 1 = 0.1153<br>Measurement 2 = 0.5617<br>Average = 0.6077 |
|                               | post-hoc Holm-Sidak<br>IOFC group (sal vs BM) | 9 rats  | p = 0.1367                                                                                                                    | t(44) = 2.036                                                                                                                              | Measurement 1 = 0.0573<br>Measurement 2 = 0.2831<br>Average = 0.2941 |
| 1c<br>Trials<br>complete<br>d | 2-way repeated<br>measures ANOVA              | 49 rats | Main drug effect<br>p = 0.3012<br><br>Main group effect<br>p = 0.0026<br><br>Group * drug<br>interaction<br>p = 0.3942        | Main drug effect<br>F(1, 45) = 1.094<br><br>Main group effect<br>F(4, 45) = 4.791<br><br>Group * drug<br>interaction<br>F(4, 45) = 1.046   |                                                                      |
| 1c<br>Response<br>latency     | 2-way repeated<br>measures ANOVA              | 49 rats | Main drug effect<br>p = 0.7208<br><br>Main group effect<br>p = 0.0709<br><br>Group * drug<br>interaction<br>p = 0.9479        | Main drug effect<br>F(1, 44) = 0.1294<br><br>Main group effect<br>F(4, 44) = 2.328<br><br>Group * drug<br>interaction<br>F(4, 44) = 0.1793 |                                                                      |
| 3<br>Reward<br>learning       | 2-way repeated<br>measures ANOVA              | 49 rats | Main drug effect<br>p < 0.0001****<br><br>Main group effect<br>p = 0.0002***<br><br>Group * drug<br>interaction<br>p = 0.5832 | Main drug effect<br>F(1, 44) = 20.40<br><br>Main group effect<br>F(4, 44) = 7.020<br><br>Group * drug<br>interaction<br>F(4, 44) = 0.7195  |                                                                      |
|                               | post-hoc Holm-Sidak<br>ACC group (sal vs BM)  | 10 rats | p = 0.3578                                                                                                                    | t(44) = 1.305                                                                                                                              | Measurement 1 = 0.1450<br>Measurement 2 = 0.1148<br>Average = 0.1672 |
|                               | post-hoc Holm-Sidak<br>PrL group (sal vs BM)  | 12 rats | p = 0.0111*                                                                                                                   | t(44) = 3.246                                                                                                                              | Measurement 1 = 0.1065<br>Measurement 2 = 0.6025<br>Average = 0.5714 |
|                               | post-hoc Holm-Sidak<br>IL group (sal vs BM)   | 9 rats  | p = 0.3578                                                                                                                    | t(44) = 1.036                                                                                                                              | Measurement 1 = 0.0000<br>Measurement 2 = 0.2580<br>Average = 0.0923 |
|                               | post-hoc Holm-Sidak<br>mOFC group (sal vs BM) | 9 rats  | p = 0.1466                                                                                                                    | t(44) = 2.002                                                                                                                              | Measurement 1 = 0.1956<br>Measurement 2 = 0.1571<br>Average = 0.2475 |
|                               | post-hoc Holm-Sidak<br>IOFC group (sal vs BM) | 9 rats  | p = 0.0435*                                                                                                                   | t(44) = 2.653                                                                                                                              | Measurement 1 = 0.3670<br>Measurement 2 = 0.4936<br>Average = 0.5913 |

| Figure                           | Test used                                            | <i>n</i>                                             | p value                                       | Test statistic                                    | Effect size<br>(Partial eta squared)                                 |                                                                      |
|----------------------------------|------------------------------------------------------|------------------------------------------------------|-----------------------------------------------|---------------------------------------------------|----------------------------------------------------------------------|----------------------------------------------------------------------|
| 3<br>Punish-<br>ment<br>learning | 2-way repeated<br>measures ANOVA                     | 49 rats                                              | Main drug effect<br>$p < 0.0001^{****}$       | Main drug effect<br>$F(1, 44) = 44.63$            |                                                                      |                                                                      |
|                                  |                                                      |                                                      | Main group effect<br>$p < 0.0001^{****}$      | Main group effect<br>$F(4, 44) = 8.281$           |                                                                      |                                                                      |
|                                  |                                                      |                                                      | Group * drug<br>interaction<br>$p = 0.1345$   | Group * drug<br>interaction<br>$F(4, 44) = 1.860$ |                                                                      |                                                                      |
|                                  |                                                      | post-hoc Holm-<br>Sidak ACC group<br>(sal vs BM)     | 10 rats                                       | $p = 0.3798$                                      | $t(44) = 0.8871$                                                     | Measurement 1 = 0.0251<br>Measurement 2 = 0.0486<br>Average = 0.0614 |
|                                  |                                                      | post-hoc Holm-<br>Sidak<br>PrL group (sal vs<br>BM)  | 12 rats                                       | $p = 0.0007^{***}$                                | $t(44) = 4.179$                                                      | Measurement 1 = 0.4016<br>Measurement 2 = 0.5421<br>Average = 0.6335 |
|                                  |                                                      | post-hoc Holm-<br>Sidak<br>IL group (sal vs BM)      | 9 rats                                        | $p = 0.0011^{**}$                                 | $t(44) = 3.945$                                                      | Measurement 1 = 0.2946<br>Measurement 2 = 0.4343<br>Average = 0.5327 |
|                                  |                                                      | post-hoc Holm-<br>Sidak<br>mOFC group (sal vs<br>BM) | 9 rats                                        | $p = 0.0497^*$                                    | $t(44) = 2.318$                                                      | Measurement 1 = 0.6776<br>Measurement 2 = 0.2121<br>Average = 0.6304 |
|                                  | post-hoc Holm-<br>Sidak<br>IOFC group (sal vs<br>BM) | 9 rats                                               | $p = 0.0019^{**}$                             | $t(44) = 3.382$                                   | Measurement 1 = 0.4988<br>Measurement 2 = 0.6789<br>Average = 0.7280 |                                                                      |
| 3<br>Stickiness                  | 2-way repeated<br>measures ANOVA                     | 49 rats                                              | Main drug effect<br>$p = 0.0005^{***}$        | Main drug effect<br>$F(1, 44) = 14.07$            |                                                                      |                                                                      |
|                                  |                                                      |                                                      | Main group effect<br>$p = 0.2508$             | Main group effect<br>$F(4, 44) = 1.397$           |                                                                      |                                                                      |
|                                  |                                                      |                                                      | Group * drug<br>interaction<br>$p = 0.0137^*$ | Group * drug<br>interaction<br>$F(4, 44) = 3.540$ |                                                                      |                                                                      |
|                                  |                                                      | post-hoc Holm-<br>Sidak ACC group<br>(sal vs BM)     | 10 rats                                       | $p = 0.9494$                                      | $t(44) = 0.3050$                                                     | Measurement 1 = 0.0440<br>Measurement 2 = 0.0976<br>Average = 0.0261 |
|                                  |                                                      | post-hoc Holm-<br>Sidak<br>PrL group (sal vs<br>BM)  | 12 rats                                       | $p = 0.9494$                                      | $t(44) = 0.4848$                                                     | Measurement 1 = 0.0001<br>Measurement 2 = 0.1298<br>Average = 0.0174 |
|                                  |                                                      | post-hoc Holm-<br>Sidak<br>IL group (sal vs BM)      | 9 rats                                        | $p = 0.0010^{**}$                                 | $t(44) = 4.046$                                                      | Measurement 1 = 0.3641<br>Measurement 2 = 0.2258<br>Average = 0.6792 |
|                                  |                                                      | post-hoc Holm-<br>Sidak<br>mOFC group (sal vs<br>BM) | 9 rats                                        | $p = 0.0115^*$                                    | $t(44) = 3.157$                                                      | Measurement 1 = 0.6981<br>Measurement 2 = 0.0675<br>Average = 0.6443 |
|                                  | post-hoc Holm-<br>Sidak<br>IOFC group (sal vs<br>BM) | 9 rats                                               | $p = 0.9494$                                  | $t(44) = 0.1775$                                  | Measurement 1 = 0.0040<br>Measurement 2 = 0.0113<br>Average = 0.0022 |                                                                      |

| Figure                   | Test used                        | <i>n</i> | p value                                                                                                                | Test statistic                                                                                                                             | Effect size<br>(Partial eta squared) |
|--------------------------|----------------------------------|----------|------------------------------------------------------------------------------------------------------------------------|--------------------------------------------------------------------------------------------------------------------------------------------|--------------------------------------|
| 3<br>Explore/<br>exploit | 2-way repeated<br>measures ANOVA | 49 rats  | Main drug effect<br>p = 0.8299<br><br>Main group effect<br>p = 0.1193<br><br>Group * drug<br>interaction<br>p = 0.2838 | Main drug effect<br>F(1, 44) = 0.04671<br><br>Main group effect<br>F(4, 44) = 1.948<br><br>Group * drug<br>interaction<br>F(4, 44) = 1.303 |                                      |

## Online Resource 2

Table containing the equations of the different models

| Model | Free parameters                  | Learning model                                                                                                                                                                                                                                                                        | Observation equation                                                                                                                                                                                                                                |
|-------|----------------------------------|---------------------------------------------------------------------------------------------------------------------------------------------------------------------------------------------------------------------------------------------------------------------------------------|-----------------------------------------------------------------------------------------------------------------------------------------------------------------------------------------------------------------------------------------------------|
| RW1   | $\alpha, \beta$                  | $Q_{s,t} = \begin{cases} Q_{s,t-1} + \alpha \cdot \text{RPE}_t & \text{for win trials} \\ Q_{s,t-1} + \alpha \cdot \text{RPE}_t & \text{for lose trials} \end{cases}$                                                                                                                 | $P_{\text{right},t} = \frac{\exp(\beta \cdot Q_{\text{right},t})}{\exp(\beta \cdot Q_{\text{left},t}) + \exp(\beta \cdot Q_{\text{right},t})}$                                                                                                      |
| RW2   | $\alpha^+, \alpha^-, \beta$      | $Q_{s,t} = \begin{cases} Q_{s,t-1} + \alpha^+ \cdot \text{RPE}_t & \text{for win trials} \\ Q_{s,t-1} + \alpha^- \cdot \text{RPE}_t & \text{for lose trials} \end{cases}$                                                                                                             | $P_{\text{right},t} = \frac{\exp(\beta \cdot Q_{\text{right},t})}{\exp(\beta \cdot Q_{\text{left},t}) + \exp(\beta \cdot Q_{\text{right},t})}$                                                                                                      |
| RW3   | $\alpha^+, \alpha^-, \beta, \pi$ | $Q_{s,t} = \begin{cases} Q_{s,t-1} + \alpha^+ \cdot \text{RPE}_t & \text{for win trials} \\ Q_{s,t-1} + \alpha^- \cdot \text{RPE}_t & \text{for lose trials} \end{cases}$                                                                                                             | $P_{\text{right},t} = \frac{\exp(\beta \cdot Q_{\text{right},t} + \pi \cdot \phi_{\text{right},t})}{\exp(\beta \cdot Q_{\text{left},t} + \pi \cdot \phi_{\text{left},t}) + \exp(\beta \cdot Q_{\text{right},t} + \pi \cdot \phi_{\text{right},t})}$ |
| RW-PH | $\alpha, \beta, \pi, \eta$       | $Q_{s,t} = \begin{cases} Q_{s,t-1} + \alpha \cdot \gamma_t \cdot \text{RPE}_t & \text{for win trials} \\ Q_{s,t-1} + \alpha \cdot \gamma_t \cdot \text{RPE}_t & \text{for lose trials} \end{cases}$<br>with<br>$\gamma_t = \eta \cdot  \text{RPE}_t  + (1 - \eta) \cdot \gamma_{t-1}$ | $P_{\text{right},t} = \frac{\exp(\beta \cdot Q_{\text{right},t} + \pi \cdot \phi_{\text{right},t})}{\exp(\beta \cdot Q_{\text{left},t} + \pi \cdot \phi_{\text{left},t}) + \exp(\beta \cdot Q_{\text{right},t} + \pi \cdot \phi_{\text{right},t})}$ |

In this table,  $\alpha$  = Rescorla-Wagner learning rate,  $\beta$  = choice stochasticity,  $\pi$  = stickiness factor,  $\eta$  = Pearce-Hall associability factor,  $Q_{s,t}$  = value of nose poke  $s$  on trial  $t$ ,  $p_{s,t}$  = choice probability of nose poke  $s$  on trial  $t$ ,  $\phi$  = boolean that is 1 if nose poke  $s$  is chosen on the previous trial and 0 if unchosen on previous trial, RPE = reward prediction error, and  $\gamma_t$  = associability on trial  $t$ .

# Online Resource 3

## Infusion locations

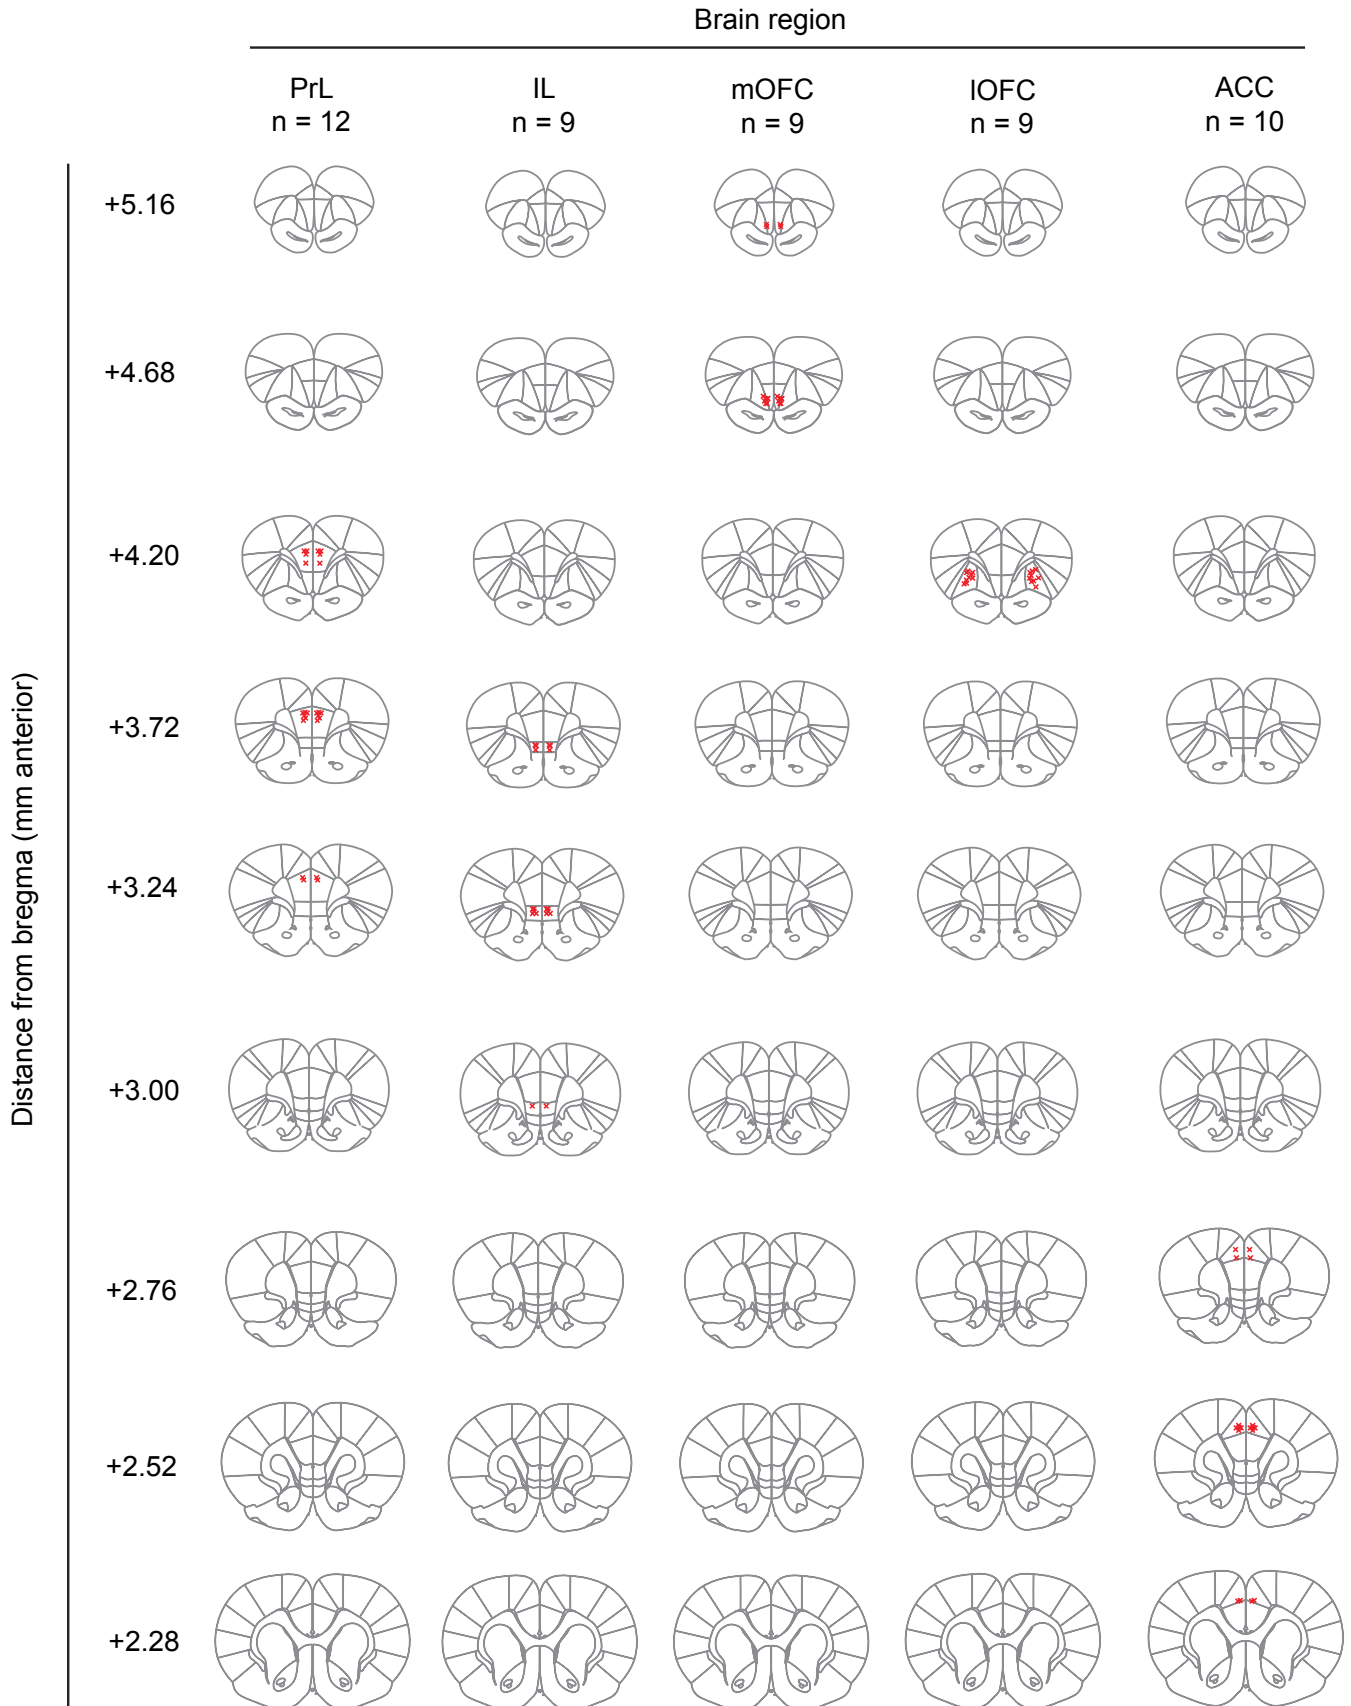

## Online Resource 4

### Model selection

|   | Model                              | Free parameters                | Aggregate LL | $P_{\text{explained}}$ | Aggregate AIC | Aggregate BIC | # of sessions best described by model | XP     | PXP    |
|---|------------------------------------|--------------------------------|--------------|------------------------|---------------|---------------|---------------------------------------|--------|--------|
| 1 | Random                             | -                              | -32757       | 0.5000                 | 65514         | 65514         | 0/196                                 | 0      | 0      |
| 2 | Rescorla-Wagner 1                  | $\alpha, \beta$                | -28815       | 0.5435                 | 58414         | 59761         | 40/196                                | 0      | 0      |
| 3 | Rescorla-Wagner 2                  | $\alpha+, \alpha-, \beta$      | -28415       | 0.5481                 | 58007         | 60026         | 25/196                                | 0      | 0      |
| 4 | Rescorla-Wagner 3                  | $\alpha+, \alpha-, \beta, \pi$ | -27818       | 0.5551                 | 57204         | 59897         | 74/196                                | 0.9999 | 0.9999 |
| 5 | Rescorla-Wagner-Pearce-Hall hybrid | $\alpha, \beta, \pi, \eta$     | -27973       | 0.5533                 | 57513         | 60206         | 57/196                                | 0.0001 | 0.0001 |

Abbreviations: LL, log-likelihood;  $P_{\text{explained}}$ , fraction of choices explained by the model on every single trial (total trials on average  $\approx 241$ ); AIC, Akaike Information Criterion; BIC, Bayesian Information Criterion; XP, exceedance probability; PXP, protected exceedance probability.



## Online Resource 5

### Model selection per inactivation condition

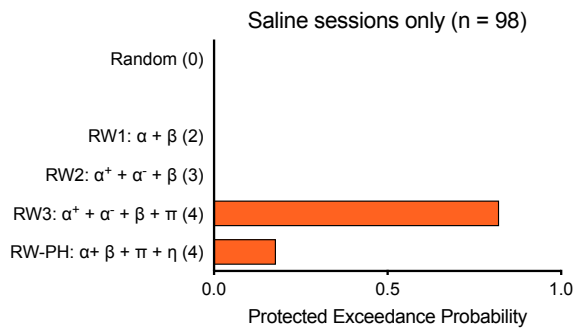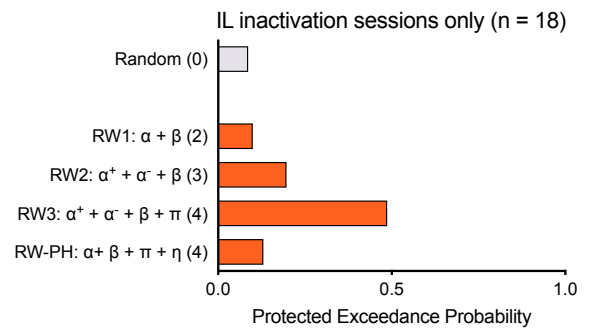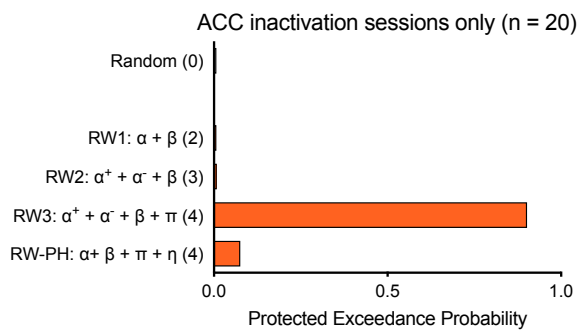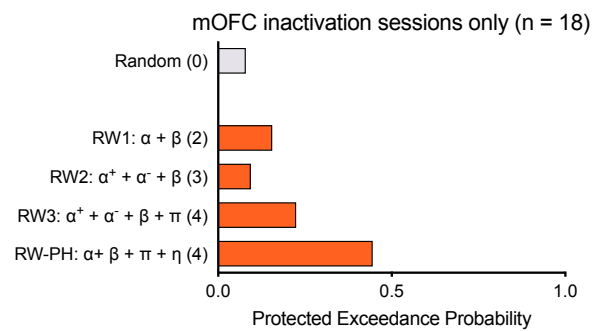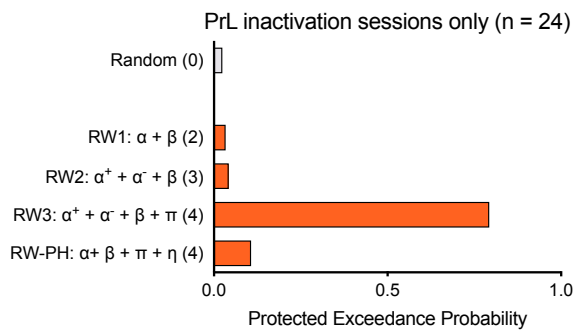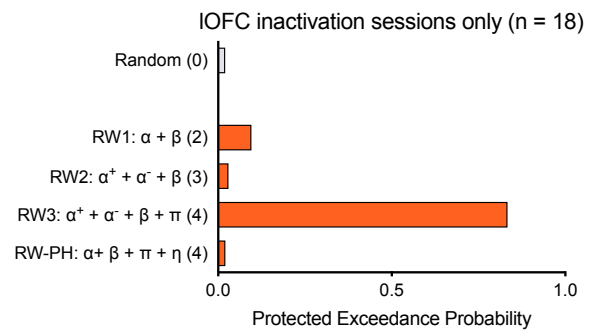

## Online Resource 6

Simulated data showing the number of reversals per 100 trials for different values of explore/exploit parameter  $\beta$

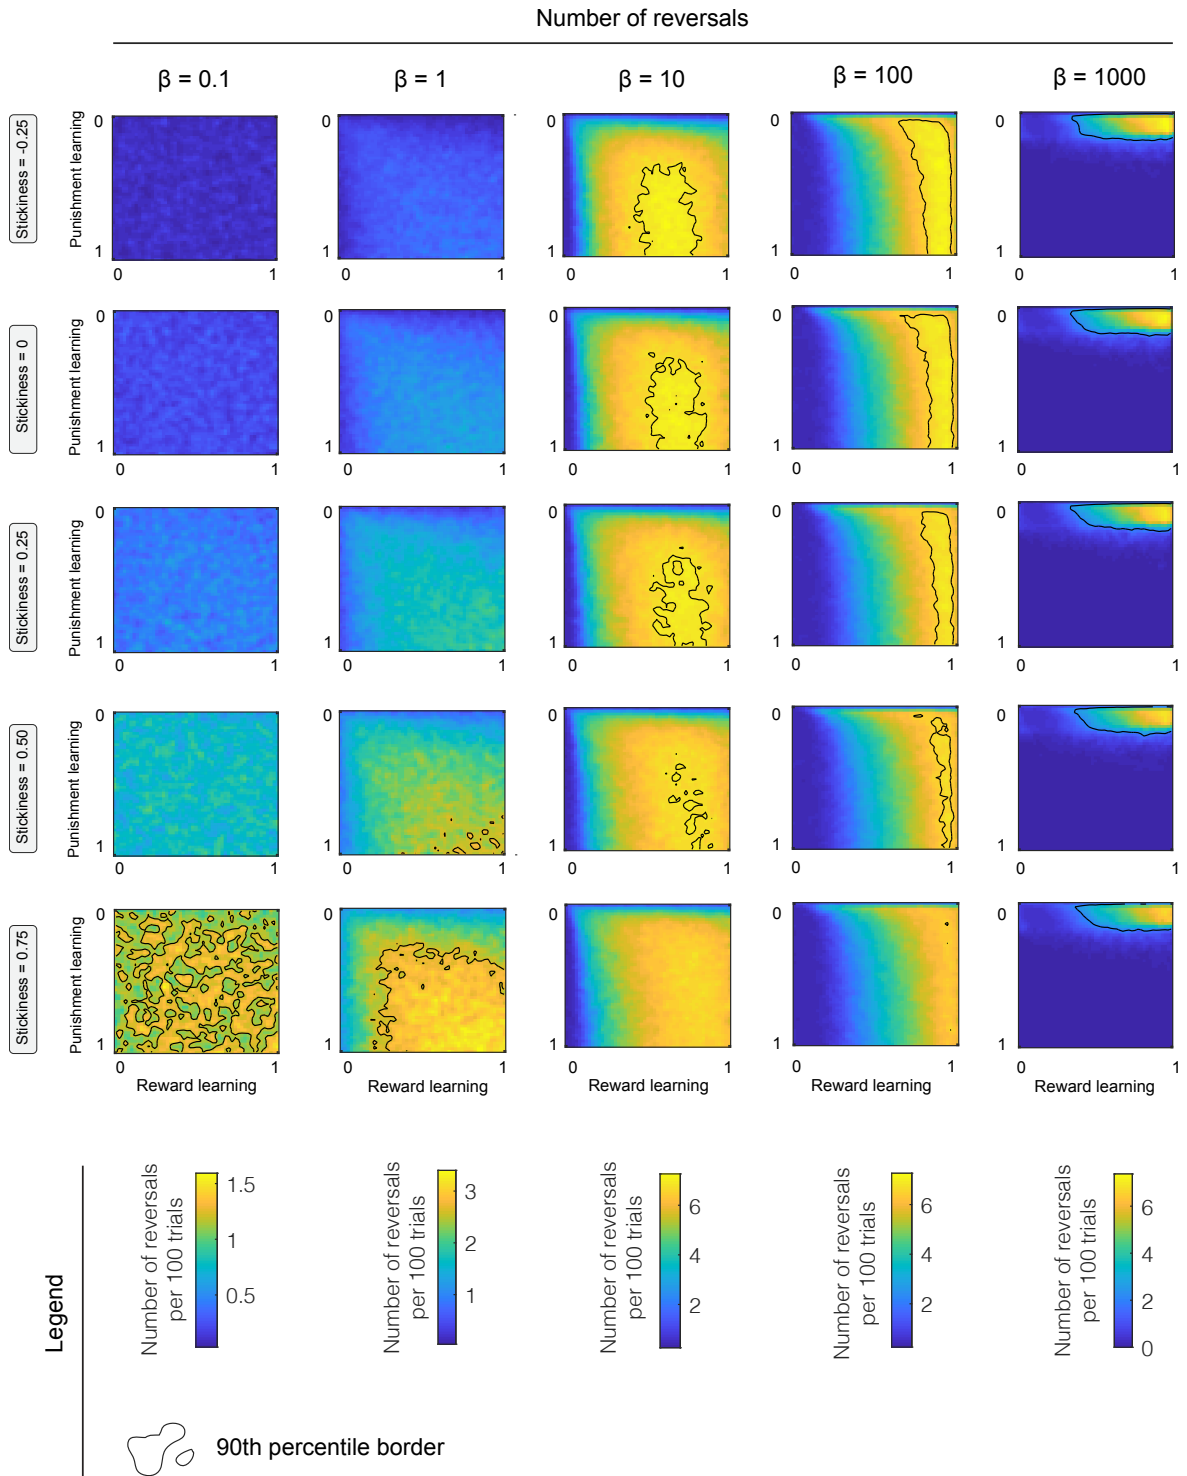

Supplement: 213_2020_5454_MOESM1_ESM.pdf [file 213_2020_5454_MOESM1_ESM.pdf]
